# Supplementary material for: Dendronized PLGA nanoparticles with anionic carbosilane dendrons as antiviral agents against HIV infection
Source: Royal Society of Chemistry journal article supplement (doi:10.1039/c6ra13461k), 2016-01-01
Supplement: c6ra13461k1.pdf [file c6ra13461k1.pdf]

## SUPPLEMENTARY INFORMATION

### DENDRONIZED PLGA NANOPARTICLES WITH ANIONIC CARBOSILANE DENDRONS AS ANTIVIRAL AGENTS AGAINST HIV INFECTION

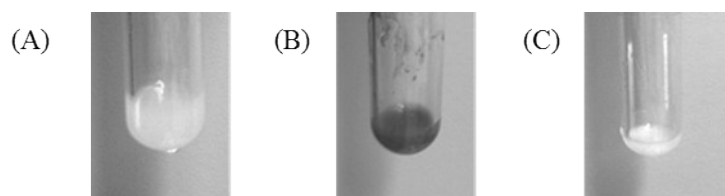

**Figure 1.** Kaiser test for a) free nanoparticles; b) free carbosilane dendron; c) NP<sub>H2O</sub> 2.
